# Supplementary material for: Suppression of the morphology mismatch at graphene/n-type organic semiconductor interfaces: a scanning Kelvin probe force microscopy investigation
Source: Royal Society of Chemistry journal article supplement (doi:10.1039/d0tc01099e), 2020-01-01
Supplement: d0tc01099e1.pdf [file d0tc01099e1.pdf]

# Suppression of the morphology mismatch in Graphene/ n-type Organic Semiconductor interfaces: a Scanning Kelvin Probe Force Microscopy investigation

## Supplementary Material Section

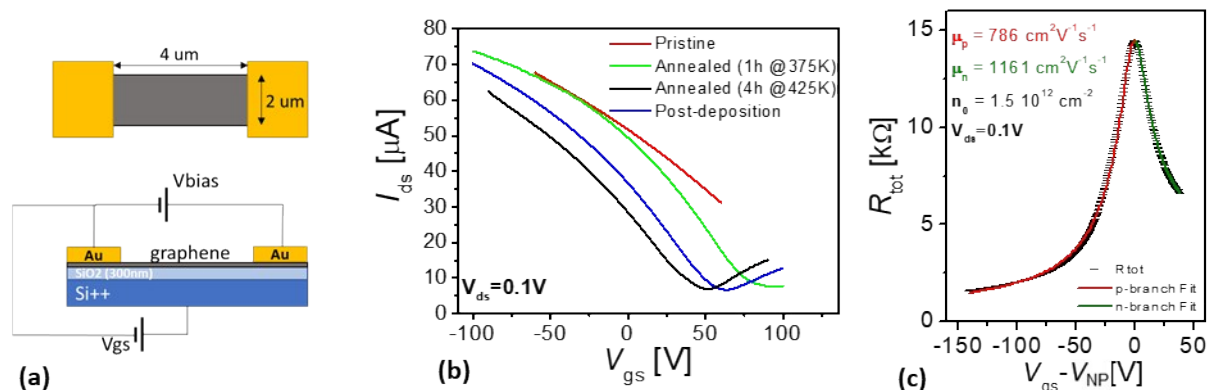

**Figure S1** (a) Schematic depiction of the graphene FET ( $L=4\mu\text{m}$ ,  $W=2\mu\text{m}$ ) (b) Transfer curves acquired for a pristine graphene channel after a thermal annealing in vacuum at 375K for 1 hour, after 4 hours at 425K and after the deposition of 40nm thick PDI8-CN<sub>2</sub> thin film. (c) Total resistance of GFET, referred to the black curve in (b), fitted in order to estimate the gate-independent hole ( $\mu_p$ ) and electron mobility ( $\mu_n$ ), as well as the residual charge density ( $n_0$ ). Neutrality point  $V_{NP}$  was found to be +50V.

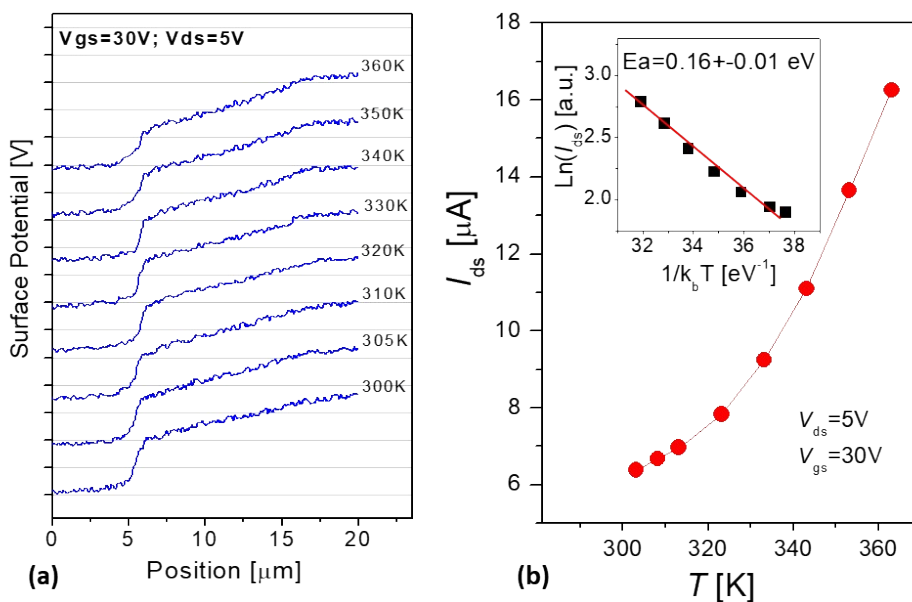

**Figure S2** (a) Surface potential profiles as function of the temperature for PDI8-CN<sub>2</sub> OFETs with graphene electrodes ( $V_{ds}=+5\text{V}$ ;  $V_{gs}=+30\text{V}$ ). (b) Current values as function of the temperature monitored during the

acquisition of the surface potentials. The inset shows the Arrhenius plot from which an activation energy

$E_a=0.16\pm 0.01\text{eV}$  is inferred by considering a  $I_{ds} \propto e^{-E_a/k_bT}$  relationship.

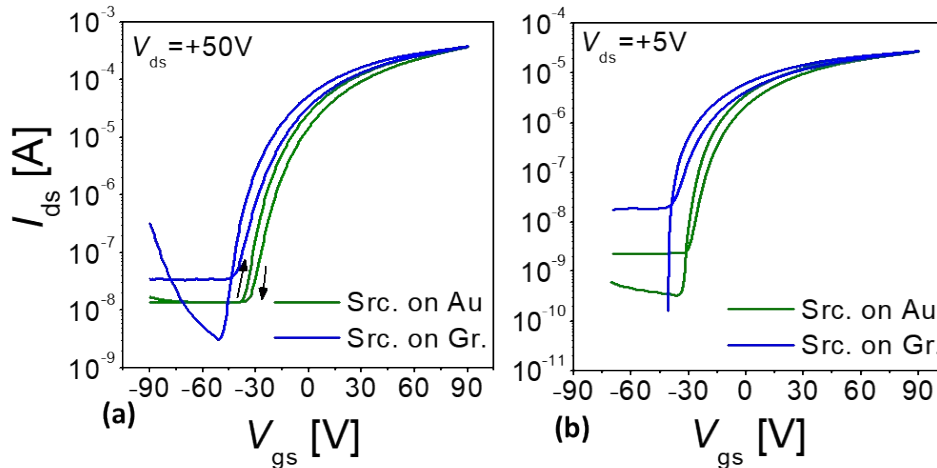

**Figure S3** (a) and (b) Transfer curves of the mixed gold/graphene layouts in saturation (a) and linear (b) regimes. The responses achieved for the two different configurations (source-on-gold and source-on-graphene) are reported.

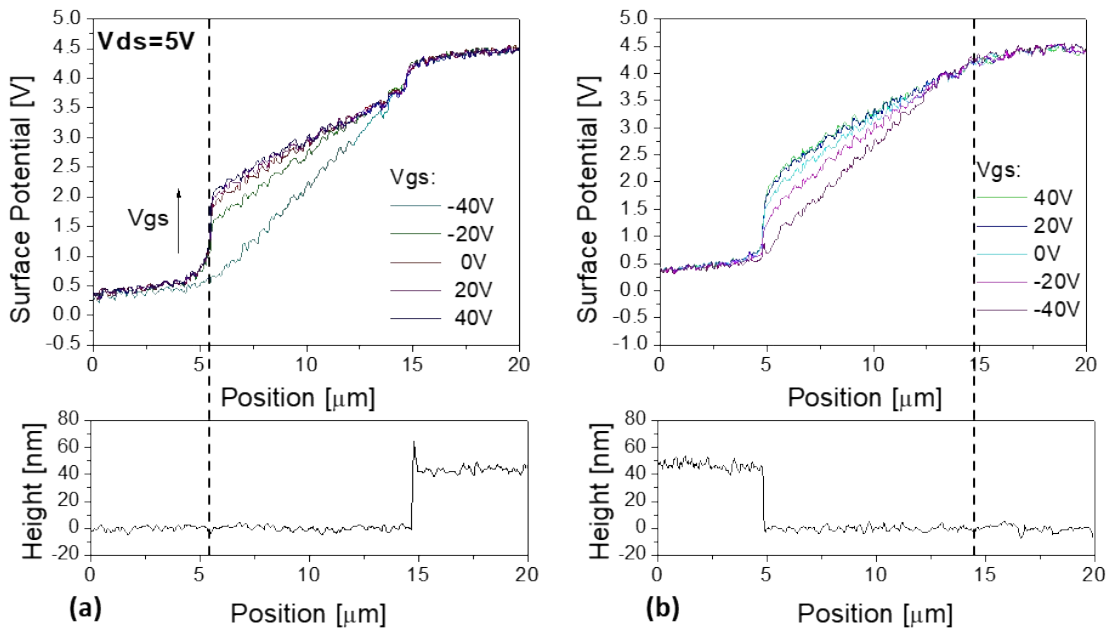

**Figure S4** Complete overview of surface potential profiles recorded for the hybrid gold-graphene architecture, as function of the applied gate-source bias ( $V_{ds}=+5\text{V}$ ) for (a) the source-on-graphene and (b) source-on-gold configurations, respectively. Lower panels show the corresponding topography of the transistor channel. Dashed vertical black lines indicate the graphene electrode boundaries.

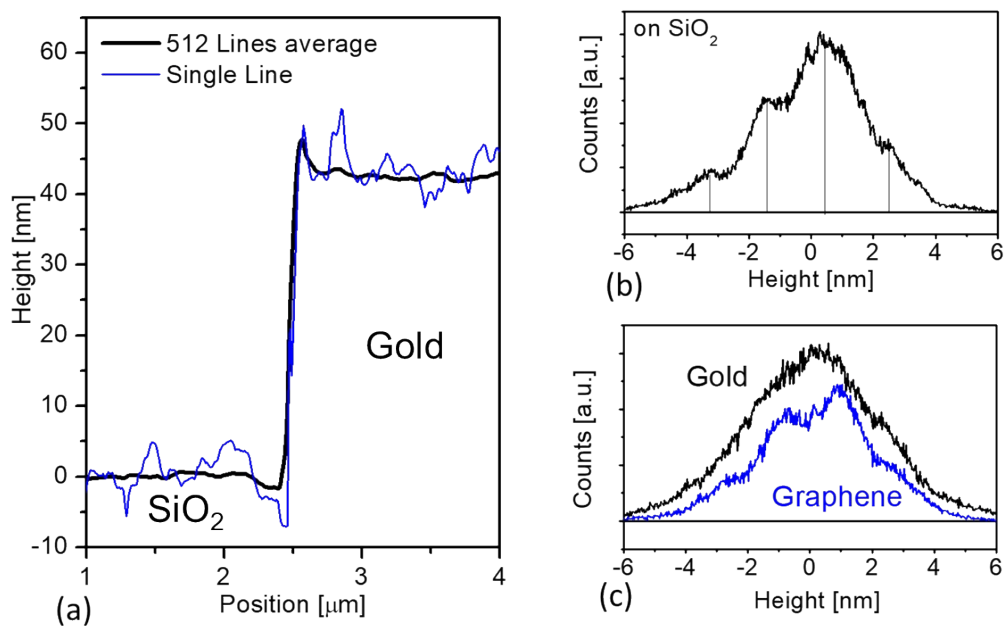

**Figure S5** (a) Single profile (blue solid line) and average over 512 lines (black solid line) morphological close-up of the PDI8-CN<sub>2</sub>/gold interface. It is possible to distinguish a distributed defective region at the very interface ( $\approx 2.5\mu\text{m}$ ). (b) Height histogram retrieved from a  $5\mu\text{m} \times 10\mu\text{m}$  AFM image ( $256 \times 512$  pixels) indicative of the PDI8-CN<sub>2</sub> thin film growth over the SiO<sub>2</sub> channel. From the analysis, it is possible to identify several peaks indicating the presence of the molecular planes of the polycrystalline morphology. (c) Similar analysis referred to PDI8-CN<sub>2</sub> films on both gold and graphene electrode surfaces.
